# Supplementary material for: Risk factors for persistence of lower respiratory symptoms among community members exposed to the 2001 World Trade Center terrorist attacks
Source: PubMed Central journal article supplement — Occup Environ Med. 2017 Mar 24;74(6):449–55. doi: 10.1136/oemed-2016-104157 (PMC5520238; doi:10.1136/oemed-2016-104157), 2017-03-24
Supplement: oemed-2016-104157supp001.pdf [file oemed-2016-104157supp001.pdf]

Supplemental table: Data sources

|                               | <b>Questionnaire 1</b>                                                                                               | <b>Questionnaire 2</b>                                        | <b>Exam 1</b>                                                                           | <b>Exam 2</b>                                            |
|-------------------------------|----------------------------------------------------------------------------------------------------------------------|---------------------------------------------------------------|-----------------------------------------------------------------------------------------|----------------------------------------------------------|
| <b>Dates</b>                  | 2003-2004                                                                                                            | 2006-2007                                                     | 2008-2010                                                                               | 2013-2014                                                |
| <b>Target sample</b>          | Rescue/recovery workers, lower Manhattan area residents or workers, area school students/teachers, passersby on 9/11 | Adult Registry enrollees                                      | Community members enrolled in Registry with and without post-9/11 LRS                   | Exam 1 participants                                      |
| <b>Number of participants</b> | 71,434                                                                                                               | 46,602<br>(68% of eligible adults)                            | 785                                                                                     | 545                                                      |
| <b>Data collected</b>         | Self-reported 9/11-related exposure history, symptoms                                                                | Self-reported 9/11-related exposure history, symptoms, PCL-17 | Self-reported 9/11-related exposure history, symptoms, spirometry, impulse oscillometry | Symptoms, PCL-17, spirometry, impulse oscillometry, FeNO |

Abbreviations: LRS=lower respiratory symptoms; PCL-17=17-item Posttraumatic Stress Checklist; FeNO=fractional exhaled nitric oxide
